# Supplementary material
Source: PubMed Central journal article supplement (PMC4799727)
Supplement: NIHMS758284-supplement-1.pdf [file NIHMS758284-supplement-1.pdf]

## Supplementary Data

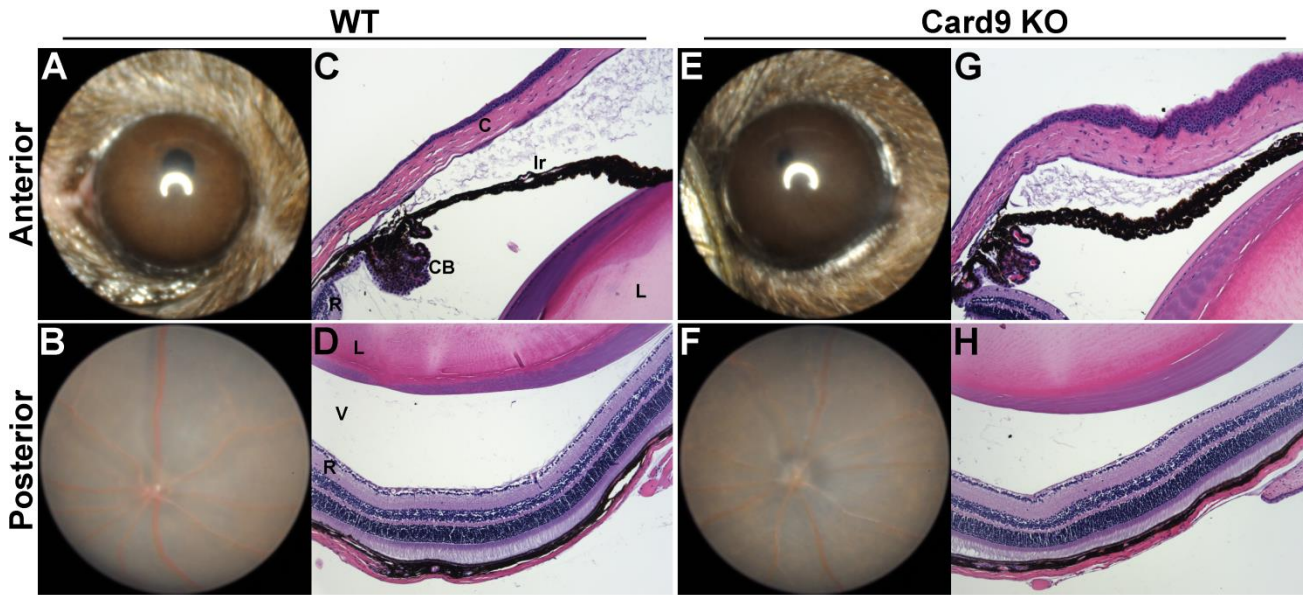

**Figure S1. Ocular examination of control WT and Card9 KO mice.** Eyes of unmanipulated Card9 KO mice are indistinguishable from eyes of WT mice. (A & E) Images of the gross external eye by dissecting microscope. (B & F) TEFI fundus images of the optic nerve and posterior pole. (C & G) Histology of anterior segment including the anterior chamber angle. (D & H) Histology of posterior segment. Of note, no discernable differences were visualized in healthy eyes versus adjuvant control mice (n = 8 mice/genotype). C, cornea; CB, ciliary body; Ir, iris; L, lens; R, retina; V, vitreous.

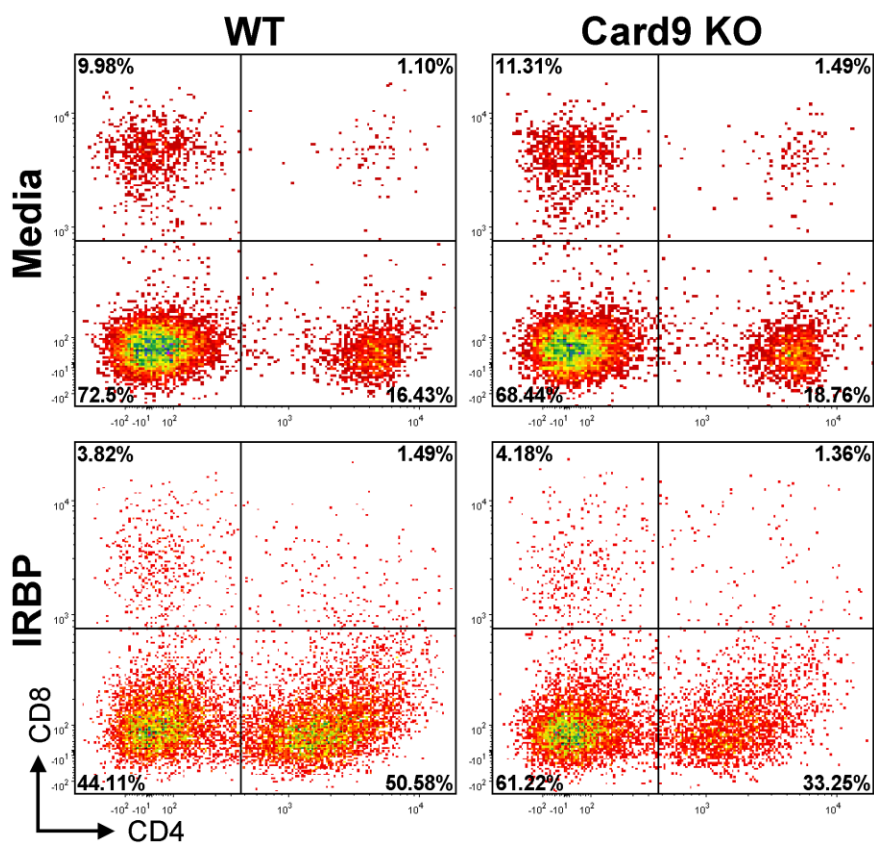

**Figure S2.** *In vitro*-stimulated (20 $\mu$ g/ml IRBP for 48h) splenocyte cultures prepared at d21 post-immunization were analyzed by flow cytometry for antigen-specific responses. Flow cytometric analysis (dot plots) showing frequency of CD4<sup>+</sup> versus CD8<sup>+</sup> cell populations in unstimulated (media) versus IRBP-stimulated conditions (n = 6-10 mice/genotype/experiment; experiment performed 3 times).

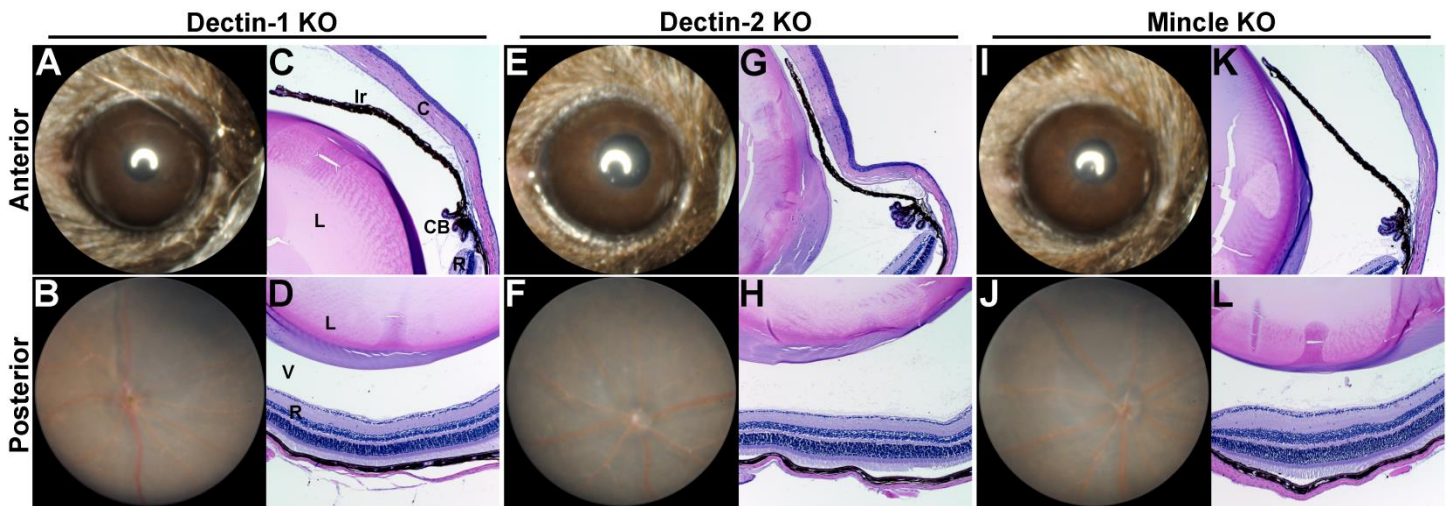

**Figure S3. Ocular examination of control CLR-deficient mice.** Eyes of Dectin-1 KO, Dectin-2 KO, and Mincle KO mice appear similar to healthy WT mice as assessed by gross examination, TEFI, and histology. (A,E,I) Images of the gross external eye by dissecting microscope. (B,F,J) Fundus images of the optic nerve and posterior pole by TEFI. (C,G,K) Histology of anterior segment including the anterior chamber angle. (D,H,L) Histology of posterior segment. Of note, no discernable differences were visualized in healthy eyes versus adjuvant control mice (n = 10 mice/genotype). C, cornea; CB, ciliary body; Ir, iris; L, lens; R, retina; V, vitreous.
